# Supplementary material
Source: publisher figshare collection journal article supplement (https://sage.figshare.com/ndownloader/files/15617192)
Supplement: Supplementary file 1 [file 15617192]

## Supplementary material.

**Table 1. Impact factors**

| <b>Impact factors</b>                                                     | <b>Reference</b>                                                                                                                                                                                                                                         |
|---------------------------------------------------------------------------|----------------------------------------------------------------------------------------------------------------------------------------------------------------------------------------------------------------------------------------------------------|
| Competition among potential service contractors                           | Brown and Potoski 2004; Brown, Potoski and Slyke, 2006; Oh and Park 2017; Girth et al., 2012; Lenferink, Tillema and Arts 2013; Amaral, Saussier and Yvrande-Billon, 2009; Hefetz and Warner, 2011; Costantino et al. 2012; Fernandez, 2007, 2009        |
| Coordination and collaboration among actors                               | Brown and Potoski 2004; Desrieux, Chong and Saussier, 2013; Mattison and Thomasson, 2007; Brown, Potoski and Slyke, 2006; Peat and Costley, 2001; Lindholst and Bogetoft, 2011; Lenferink, Tillema and Arts 2013; Ke, Ling and Zou 2015; Fernandez, 2007 |
| Support from politicians, employees and end-users                         | Brown, Potoski and Slyke, 2006; Amirkhanyan, Kim and Lambright, 2007; Warner and Hefetz, 2008, Ohemeng and Grant 2014; Romzek and Johnston, 2005; Fernandez, 2009                                                                                        |
| Flexible adjustments of RFPs, contracts and sanctions                     | Fernandez, 2007                                                                                                                                                                                                                                          |
| Trust relations and mutual learning                                       | Mattison and Thomasson, 2007; Brown, Potoski and Slyke, 2006; Desrieux, Chong and Saussier, 2013; Oh and Park, 2017; Ke, Ling and Zou, 2015; Fernandez, 2009                                                                                             |
| Extrinsic and intrinsic motivation of contractors                         | Lindholst and Bogetoft, 2011; Amirkhanyan, Kim and Lambright, 2007; Koning and Heinrich, 2013                                                                                                                                                            |
| Competencies, capacities and resources of contractors and public managers | Brown, Potoski and Slyke, 2006; Hefetz and Warner, 2011; Amirkhanyan, Kim and Lambright, 2007; Lindholst and Bogetoft, 2011; Mattison and Thomasson, 2007                                                                                                |
| Monitoring of contract performances                                       | Peat and Costley, 2001; Romzek and Johnston, 2005; Oh and Park, 2017; Amirkhanyan, Kim and Lambright, 2007; Brown, Potoski and Slyke, 2006; Brown and Potoski, 2004; Fernandez, 2009                                                                     |
